# Supplementary material for: Graphene oxide supported sodium stannate lithium ion battery anodes by the peroxide route: low temperature and no waste processing
Source: Royal Society of Chemistry journal article supplement (doi:10.1039/c5ta04514b), 2015-01-01
Supplement: c5ta04514b1.pdf [file c5ta04514b1.pdf]

## Electronic Supplementary Information (ESI)

### Graphene oxide supported sodium stannate lithium ion battery anodes by the peroxide route: Low temperature and no waste processing

A. A. Mikhaylov,<sup>a,b</sup> A. G. Medvedev,<sup>a,b</sup> C. W. Mason,<sup>c</sup> A. Nagasubramanian,<sup>c,d,e</sup> S. Madhavi,<sup>c,d,e</sup> S. K. Batabyal,<sup>d</sup> Q. Zhang,<sup>e</sup> J. Gun,<sup>b</sup> P. V. Prihodchenko\*<sup>a,d</sup> and O. Lev\*<sup>b</sup>

<sup>a</sup>Kurnakov Institute of General and Inorganic Chemistry, Russian Academy of Sciences, Leninskii prosp.31, Moscow 119991, Russia.

<sup>b</sup>The Casali Center of Applied Chemistry, The Institute of Chemistry, The Hebrew University of Jerusalem, Jerusalem 91904, Israel.

<sup>c</sup>TUM CREATE, 1 CREATE Way, 10-02 Create Tower, Singapore 138602, Singapore.

<sup>d</sup>Energy Research Institute @ NTU, Nanyang Technological University, 50 Nanyang Avenue, Singapore 639798, Singapore.

<sup>e</sup>School of Materials Science and Engineering, Nanyang Technological University 50 Nanyang Avenue, Singapore 639798, Singapore

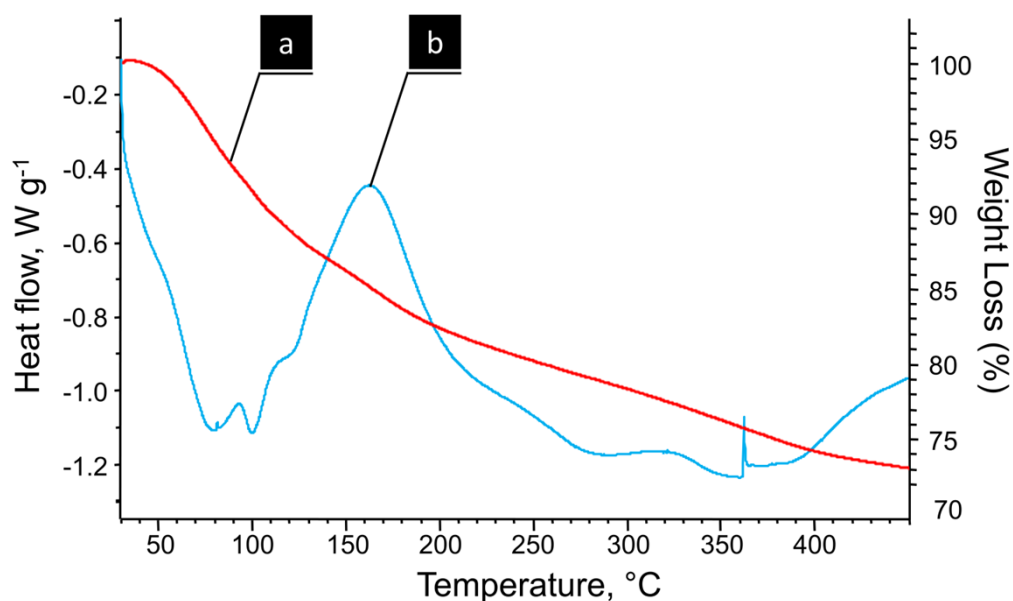

**Fig. S1** Thermal analysis of GO supported sodium peroxostannate a) thermogravimetry, TG; b) differential scanning calorimetry, DSC

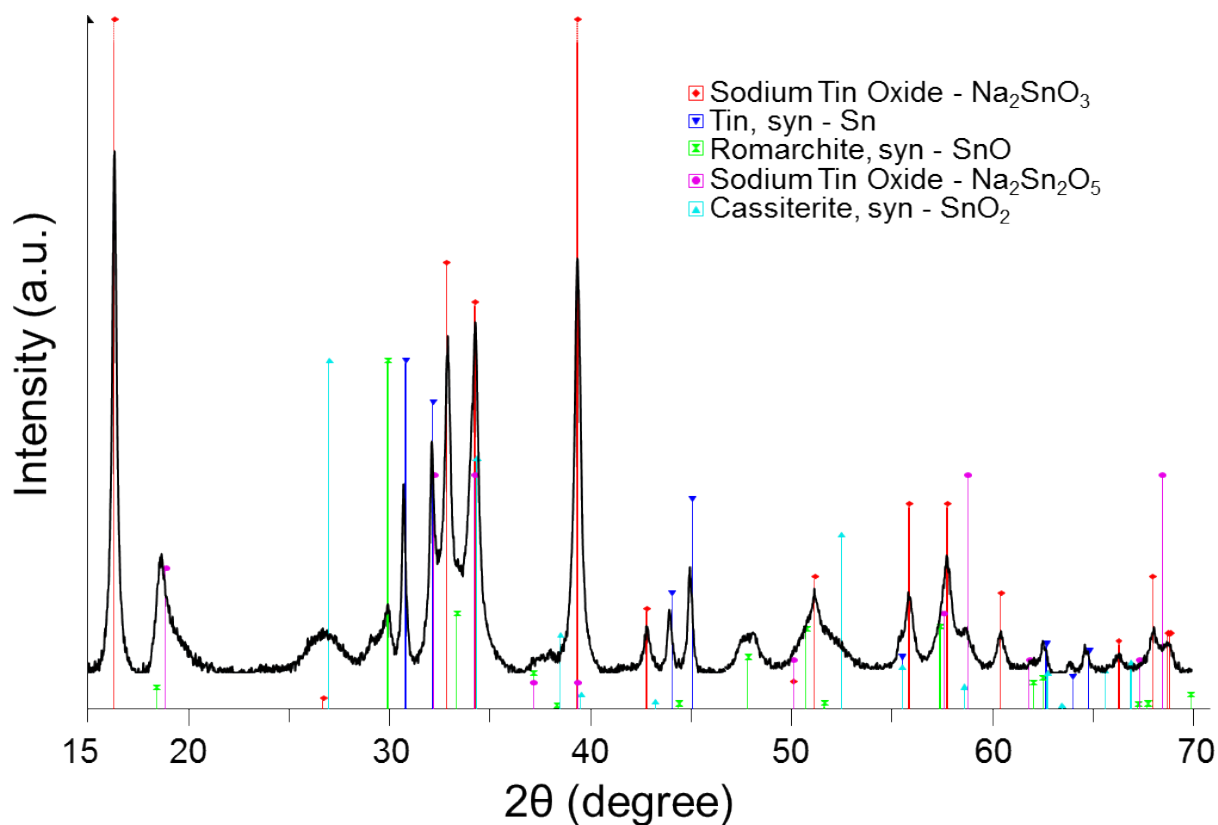

**Fig. S2** X-ray diffractogram of sodium stannate heat treated in vacuum NaSnOx-GO500-2.

**Results of phase analysis of NaSnOx-GO500-2.**

00-030-1252 Sodium Tin Oxide  $\text{Na}_2\text{SnO}_3$

Crystallite Size (Scherrer): 172.1 Å

System: Triclinic

Space group:

Cell param.: Initial Final

a: 3.64000 3.64414

b: 5.79600 5.78589

c: 2.81300 2.81308

alpha: 102.170 102.326

beta: 100.630 100.883

gamma: 72.830 72.883

04-003-5664 Tin Sn

Crystallite Size (Scherrer): 326.3 Å

System: Tetragonal

Space group: I41/amd (141)

Cell param.: Initial Final

a: 5.81510 5.81810

c: 3.17600 3.17666

04-008-7670 Romarchite SnO  
Crystallite Size (Scherrer): 18.9 Å  
System: Tetragonal  
Space group: P4/nmm (129)  
Cell param.: Initial Final  
a: 3.80360 3.79625  
c: 4.83850 4.83850

01-071-4819 Cassiterite SnO<sub>2</sub>  
Crystallite Size (Scherrer): 25.0 Å  
System: Tetragonal  
Space group: P42/mnm (136)  
Cell param.: Initial Final  
a: 4.68000 Fixed  
c: 3.15000 Fixed  
c: 3.15000 Fixed

00-021-1165 Sodium Tin Oxide Na<sub>2</sub>Sn<sub>2</sub>O<sub>5</sub>  
Crystallite Size (Scherrer): 116.7 Å

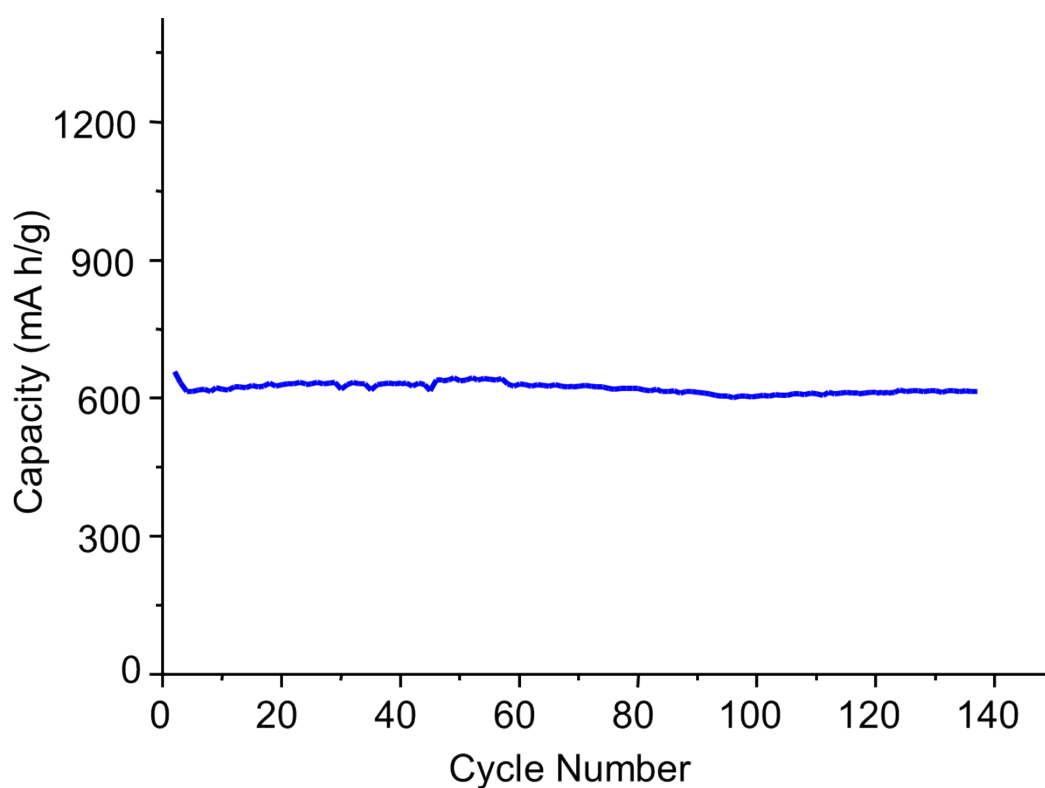

**Fig. S3** Charge capacity of the NaSnO<sub>x</sub>-GO400 anodes upon repeated cycling. The cycles were conducted at a rate of 100 mA g<sup>-1</sup> between 0–2.5 V vs. Li/Li<sup>+</sup>.

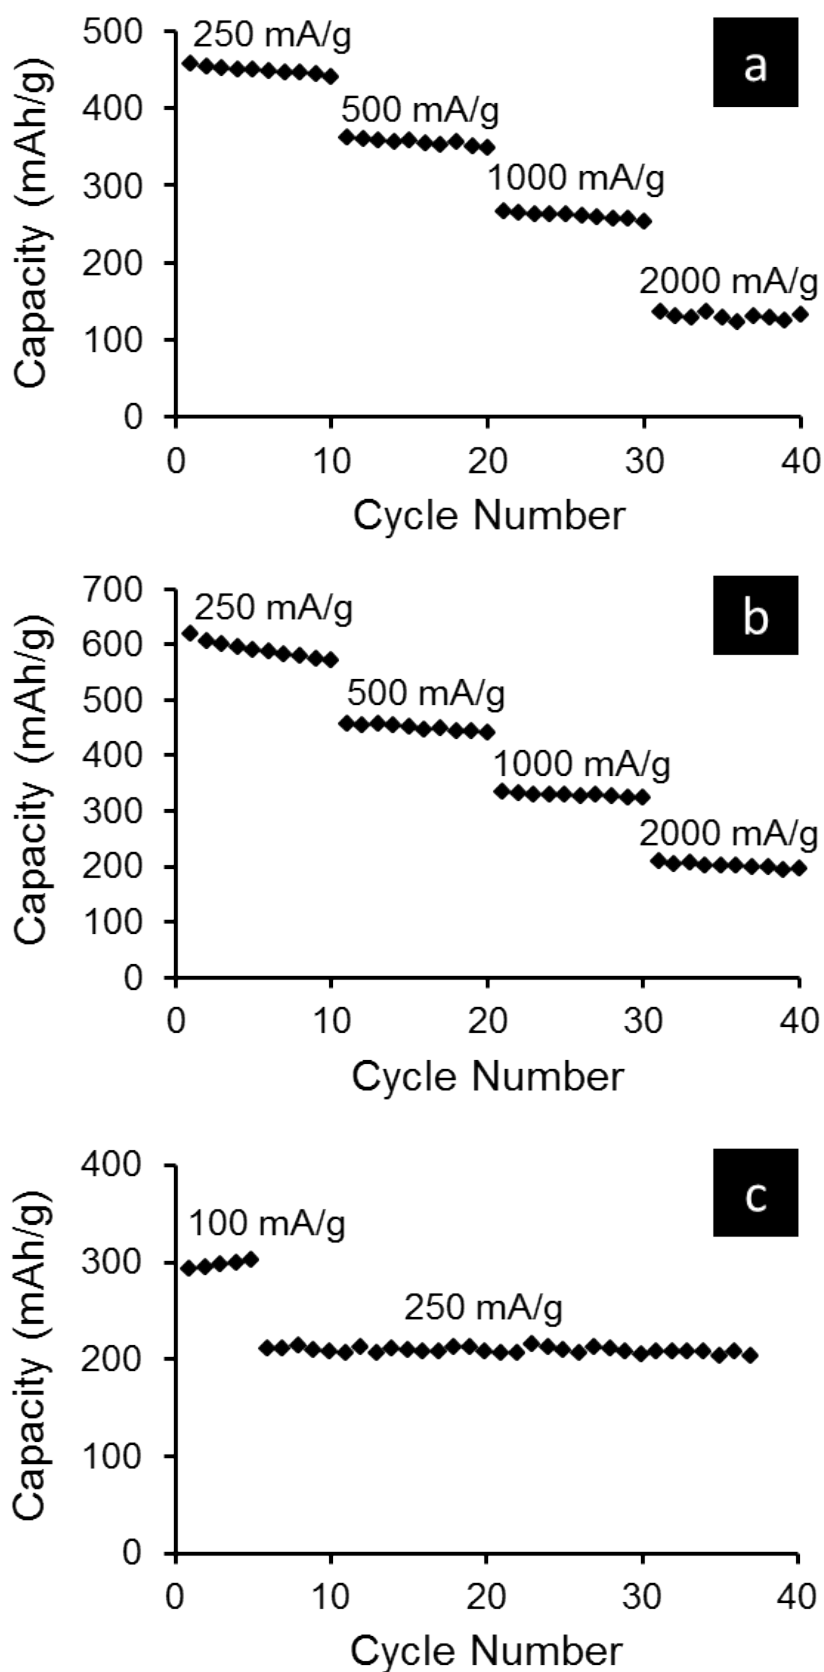

**Fig. S4** Charging capacities of the NaSnO<sub>x</sub>-GO400 anodes with different compositions 90% active material and 10% CMC without adding carbon (a), 80% active material, 10% CMC and 10% acetylene black (b), 80% active material and 20% CMC without adding carbon (c) conducted over the range 0–2.5 V vs. Li/Li<sup>+</sup> electrode at different rates.

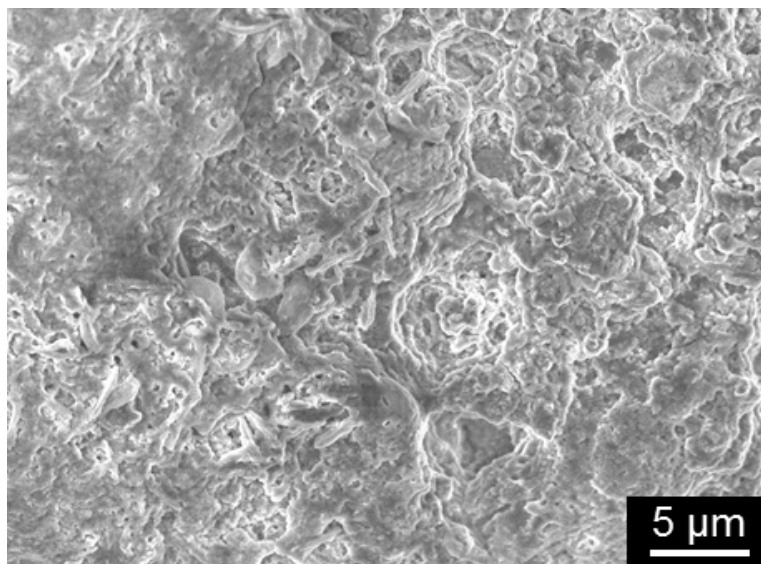

**Fig. S5** STEM image of NaSnO<sub>x</sub>-GO400 anode after cycling.

## **Experimental**

### **Microscopies and spectroscopies.**

**High-resolution transmission electron microscope (HRTEM).** We used a FEI Technai F20 G2 (Eindhoven, Holland) high-resolution transmission electron microscopes. HRTEM imaging was performed at 200 kV. A drop of the suspension of the sample in ethanol was deposited onto 400 mesh copper grids covered with a lacy carbon net.

**High-resolution scanning electron microscope (HRSEM).** HRSEM imaging was performed using a FEI Sirion high-resolution scanning electron microscope (Eindhoven, Holland). The accelerating voltage was set at 5–15 kV with a 5 mm working distance. Imaging was conducted using the high-resolution mode with a through-the-lens detector. The specimen was prepared by dispersion of dried samples in ethanol in an ultrasonic bath, and the suspension was then dropped on a silicon wafer to dry.

**Scanning transmission electron microscope (STEM).** STEM imaging was performed at 20 kV using a FEI extra high-resolution scanning electron microscope, Magellan<sup>TM</sup> 400L (Eindhoven, Holland). The specimen was prepared by deposition of a drop of the ethanol suspension of the sample onto 400 mesh copper grid.

**X-ray photoelectron spectroscopy (XPS).** XPS measurements were performed on a Kratos Axis Ultra x-ray photoelectron spectrometer (Manchester, UK). High-resolution spectra were acquired with a monochromated Al K $\alpha$  (1486.6 eV) x-ray source with 0° takeoff angle. The pressure in the test chamber was maintained at  $1.7 \times 10^{-9}$  Torr during the acquisition process.

Data analysis was performed with Vision processing data reduction software (Kratos Analytical Ltd) and CasaXPS (Casa Software Ltd).

**X-ray powder diffraction (XRD).** XRD measurements were performed on a D8 Advance Diffractometer (Bruker AXS, Karlsruhe, Germany) with a goniometer radius 217.5 mm, Gobel Mirror parallel-beam optics, 2° Soller slits and a 0.2 mm receiving slit. The powder samples were carefully filled into low-background quartz sample holders. The specimen weight was approximately 0.5 g. XRD patterns from 5° to 65° 2 $\theta$  were recorded at room temperature using Cu K $\alpha$  radiation ( $\lambda = 1.5418$  Å) under the following measurement conditions: tube voltage of 40 kV, tube current of 40 mA, step scan mode with a step size 0.02° 2 $\theta$  and counting time of 2 s/step. XRD patterns were processed using Diffrac Plus software.
